# Supplementary material
Source: PubMed Central journal article supplement (PMC9724851)
Supplement: EIJ-D-20-00498_Ali_SD.pdf [file EIJ-D-20-00498_Ali_SD.pdf]

## Supplementary data

**Supplementary Table 1. Baseline clinical characteristics.**

| <b>Clinical variables</b>         | <b>OCT (n=153)</b> | <b>IVUS (n=136)</b> | <b>Angiography (n=142)</b> |
|-----------------------------------|--------------------|---------------------|----------------------------|
| Age, years                        | 66 (59-72)         | 66 (61-73)          | 67 (56-75)                 |
| Male sex                          | 69%                | 74%                 | 73%                        |
| Hypertension                      | 78%                | 78%                 | 75%                        |
| Dyslipidaemia                     | 73%                | 75%                 | 77%                        |
| Diabetes mellitus                 | 33%                | 36%                 | 28%                        |
| Current smoker                    | 17%                | 13%                 | 23%                        |
| Serum creatinine, mg/dL           | 0.92 (0.80-1.10)   | 0.93 (0.80-1.10)    | 0.91 (0.80-1.10)           |
| Silent ischaemia/staged procedure | 33%                | 29%                 | 29%                        |
| Stable angina                     | 34%                | 35%                 | 35%                        |
| Acute coronary syndrome           | 33%                | 36%                 | 36%                        |

Values are % or median (interquartile range).

IVUS: intravascular ultrasound; OCT: optical coherence tomography

**Supplementary Table 2. Angiographic and procedural characteristics.**

|                                  | OCT (n=153)      | IVUS (n=136)     | Angiography (n=142) | <i>p</i> -value |                    |
|----------------------------------|------------------|------------------|---------------------|-----------------|--------------------|
|                                  |                  |                  |                     | OCT vs IVUS     | OCT vs angiography |
| Angiographic variables           |                  |                  |                     |                 |                    |
| LAD/LCx/RCA, %                   | 52/27/22         | 50/27/22         | 57/20/23            | 0.67            | 0.72               |
| Thrombus, %                      | 0.7              | 1.5              | 1.4                 | 0.60            | 0.61               |
| Calcification (mod to severe), % | 20               | 17               | 26                  | 0.47            | 0.24               |
| Reference vessel diameter, mm    | 2.78 (2.43-3.12) | 2.91 (2.59-3.18) | 2.76 (2.50-3.10)    | 0.16            | 0.99               |
| Minimum lumen diameter, mm       | 0.99 (0.70-1.23) | 1.05 (0.73-1.26) | 0.96 (0.68-1.21)    | 0.69            | 0.58               |
| Diameter stenosis, %             | 64.0 (55.8-72.8) | 63.3 (56.0-73.3) | 65.4 (57.6-74.9)    | 1.00            | 0.43               |
| Lesion length, mm                | 15.3 (11.0-23.2) | 15.3 (11.1-23.0) | 14.7 (10.6-20.0)    | 0.99            | 0.35               |
| TIMI 3 flow, %                   | 92%              | 89%              | 88%                 | 0.35            | 0.23               |
| Procedural variables             |                  |                  |                     |                 |                    |
| Radial access, %                 | 67%              | 59%              | 61%                 | 0.13            | 0.28               |
| Stents per lesion, n             | 1 (1-1)          | 1 (1-1)          | 1 (1-1)             | 0.47            | 0.84               |
| Stent length, mm                 | 23 (15-32)       | 24 (16-32)       | 20 (16-30)          | 0.96            | 0.35               |
| Maximal stent diameter, mm       | 3.00 (2.75-3.50) | 3.13 (2.75-3.50) | 3.00 (2.75-3.50)    | 0.26            | 0.34               |
| Post-dilatation balloons used, n | 2 (1-3)          | 2 (1-3)          | 1 (1-2)             | 0.81            | 0.0009             |
| Maximum balloon size, mm         | 3.5 (3.0-4.0)    | 3.5 (3.0-4.0)    | 3.0 (2.8-3.5)       | 0.93            | 0.0003             |
| Maximum inflation pressure, atm  | 18 (16-20)       | 19 (16-20)       | 18 (16-20)          | 0.67            | 0.02               |
| Procedure duration, min          | 71 (57-100)      | 72 (53-99)       | 57 (39-78)          | 0.99            | <0.0001            |
| Radiation dose, Gy               | 1.3 (0.9-2.0)    | 1.2 (0.7-2.3)    | 1.2 (0.7-2.0)       | 0.95            | 0.46               |
| Contrast volume, mL              | 225 (160-285)    | 196 (143-250)    | 183 (137-250)       | 0.018           | 0.0013             |

IVUS: intravascular ultrasound; LAD: left anterior descending artery; LCx: left circumflex artery; OCT: optical coherence tomography; RCA: right coronary artery; TIMI: Thrombolysis In Myocardial Infarction

**Supplementary Table 3. Post-procedure OCT measures.**

|                                     | OCT (n=136)      | IVUS (n=126)     | Angiography (n=136) | <i>p</i> -value |                    |
|-------------------------------------|------------------|------------------|---------------------|-----------------|--------------------|
|                                     |                  |                  |                     | OCT vs IVUS     | OCT vs angiography |
| Stent expansion indices             |                  |                  |                     |                 |                    |
| Minimal stent area, mm <sup>2</sup> | 5.79 (4.58-7.34) | 6.20 (4.69-7.92) | 5.49 (4.39-6.59)    | 0.52            | 0.17               |
| Minimal stent expansion, %          | 87±17            | 87±16            | 83±13               | 0.82            | 0.02               |
| Mean stent expansion, %             | 106 (98-119)     | 106 (97-116)     | 101 (92-110)        | 0.80            | 0.002              |
| Stent expansion                     |                  |                  |                     |                 |                    |
| Optimal (>95%)                      | 25%              | 25%              | 17%                 | 0.94            | 0.09               |
| Acceptable (90 to <95%)             | 15%              | 13%              | 3.8%                | 0.59            | 0.001              |
| Unacceptable (<90%)                 | 60%              | 62%              | 80%                 | 0.65            | 0.0004             |
| Post-procedure findings             |                  |                  |                     |                 |                    |
| Dissection (any)                    | 27%              | 42%              | 44%                 | 0.013           | 0.004              |
| Major                               | 14%              | 28%              | 18%                 | 0.003           | 0.30               |
| Minor                               | 14%              | 13%              | 26%                 | 0.95            | 0.013              |
| Malapposition (any)                 | 41%              | 38%              | 61%                 | 0.65            | 0.001              |
| Major                               | 11%              | 20%              | 32%                 | 0.046           | <0.0001            |
| Minor                               | 30%              | 19%              | 28%                 | 0.03            | 0.75               |
| Tissue protrusion (any)             | 68%              | 74%              | 67%                 | 0.29            | 0.83               |
| Major                               | 19%              | 21%              | 18%                 | 0.73            | 0.68               |
| Minor                               | 49%              | 53%              | 50%                 | 0.49            | 0.91               |

Values are mean±standard deviation or median (interquartile range). IVUS: intravascular ultrasound; OCT: optical coherence tomography
